# Supplementary material for: Pseudomonas aeruginosa LptE is crucial for LptD assembly, cell envelope integrity, antibiotic resistance and virulence
Source: PubMed Central journal article supplement (PMC7204523; doi:10.1080/21505594.2018.1537730), 2018-11-04
Supplement: kvir-09-01-1537730-s0001.pdf [file kvir-09-01-1537730-s0001.pdf]

***Pseudomonas aeruginosa* LptE is not directly involved in lipopolysaccharide transport but is crucial for LptD assembly, cell envelope integrity, antibiotic resistance and infectivity**

Alessandra Lo Sciuto<sup>a\*</sup>, Alessandra M. Martorana<sup>b\*</sup>, Regina Fernández-Piñar<sup>a</sup>, Carmine Mancone<sup>c</sup>,  
Alessandra Polissi<sup>b</sup>, and Francesco Imperi<sup>a#</sup>

**Table S1.** Bacterial strains and plasmids used in this study

| Strain or plasmid                         | Genotype and/or relevant characteristics                                                                                                   | Reference or source                  |
|-------------------------------------------|--------------------------------------------------------------------------------------------------------------------------------------------|--------------------------------------|
| <b><i>P. aeruginosa</i></b>               |                                                                                                                                            |                                      |
| PAO1 (ATCC15692)                          | Prototroph                                                                                                                                 | American type culture collection     |
| <i>lptE</i>                               | <i>lptE</i> conditional mutant of PAO1, deleted of the <i>lptE</i> coding sequence and carrying an arabinose-dependent copy of <i>lptE</i> | This work                            |
| <i>lptH</i>                               | <i>lptH</i> conditional mutant of PAO1, deleted of the <i>lptH</i> coding sequence and carrying an arabinose-dependent copy of <i>lptH</i> | Fernandez-Pinar <i>et al.</i> , 2015 |
| PAO1 <i>lptD-6his</i>                     | PAO1 carrying a 6his-tag sequence fused in frame to the 3' end of the <i>lptD</i> gene                                                     | This work                            |
| <i>lptE lptD-6his</i>                     | <i>lptE</i> conditional mutant carrying a 6his-tag sequence fused in frame to the 3' end of the <i>lptD</i> gene                           | This work                            |
| <b><i>E. coli</i></b>                     |                                                                                                                                            |                                      |
| S17.1 $\lambda$ <i>pir</i>                | <i>thi pro hsdRhsdM<sup>+</sup> recA RP4-2-Tc::Mu-Km::Tn7 <math>\lambda</math>pir</i> , Sm <sup>R</sup>                                    | Simon <i>et al.</i> , 1983           |
| <b>Plasmid</b>                            |                                                                                                                                            |                                      |
| pBluescript II KS+ (pBS)                  | Cloning vector; ColE1 replicon; Ap <sup>R</sup>                                                                                            | Stratagene                           |
| pDM4                                      | Suicide vector; <i>sacB<sup>R</sup></i> , <i>oriR6K</i> ; Cm <sup>R</sup>                                                                  | Milton <i>et al.</i> , 1994          |
| pDM4 $\Delta$ <i>lptE</i>                 | pDM4 derivative for <i>lptE</i> in-frame deletion                                                                                          | This work                            |
| mini-CTX1- <i>araCP<sub>BAD</sub>tolB</i> | mini-CTX1 derivative carrying the <i>araCP<sub>BAD</sub>tolB</i> , Tc <sup>R</sup>                                                         | Lo Sciuto <i>et al.</i> , 2014       |
| mini-CTX1- <i>araCP<sub>BAD</sub>lptE</i> | mini-CTX1- <i>araCP<sub>BAD</sub>tolB</i> derivative in which <i>tolB</i> has been replaced with the <i>lptE</i> coding sequence           | This work                            |
| pME6032                                   | IPTG inducible expression vector, Tc <sup>R</sup>                                                                                          | Heeb <i>et al.</i> , 2002            |
| pME <i>lptE</i>                           | pME6032-derivative carrying an IPTG-inducible copy of <i>lptE</i>                                                                          | This work                            |
| pDM4 <i>lptD-6his</i>                     | pDM4 derivative for replacement of <i>lptD</i> with <i>lptD-6his</i> , encoding an LptD protein with a 6-His tag at the C-terminus         | This work                            |

## References

- Heeb S, Blumer C, Haas D. Regulatory RNA as mediator in GacA/RsmA-dependent global control of exoproduct formation in *Pseudomonas fluorescens* CHA0. *J Bacteriol.* 2002;184:1046-1056.
- Fernández-Piñar R, Lo Sciuto A, Rossi A, et al. *In vitro* and *in vivo* screening for novel essential cell-envelope proteins in *Pseudomonas aeruginosa*. *Sci Rep.* 2015;5:17593.
- King JD, Kocíncová D, Westman EL, Lam JS. Review: Lipopolysaccharide biosynthesis in *Pseudomonas aeruginosa*. *Innate Immun.* 2009;15:261-312.
- Lo Sciuto A, Fernández-Piñar R, Bertuccini L, et al. The periplasmic protein TolB as a potential drug target in *Pseudomonas aeruginosa*. *PLoS One.* 2014;9:e103784.
- Milton DL, O'Toole R, Horstedt P, Wolf-Watz H. Flagellin A is essential for the virulence of *Vibrio anguillarum*. *J Bacteriol.* 1996;178:1310-1319.
- Simon R, Prierer U, Pühler A. A broad host range mobilization system for *in vivo* genetic engineering: transposon mutagenesis in Gram negative bacteria. *Bio/Technology.* 1983;1:784-790.

**Table S2.** Primers used in this study <sup>a</sup>

| Primer name               | Sequence (5'→3') <sup>b</sup>                                 | Restriction site | Application                                                       |
|---------------------------|---------------------------------------------------------------|------------------|-------------------------------------------------------------------|
| <i>lptE</i> _FW           | GGAGTGAGGGA <u>AGCTT</u> GATG                                 | HindIII          | Generation of mini-CTX1- <i>araCP</i> <sub>BAD</sub> <i>lptE</i>  |
| <i>lptE</i> _RV           | c <u>ggaattc</u> TCACGGGGTGGGGA <sup>b</sup> ACTC             | EcoRI            | Generation of mini-CTX1- <i>araCP</i> <sub>BAD</sub> <i>lptE</i>  |
| <i>lptE</i> mut_UP_FW     | cc <u>gctcg</u> AGGCCAGCCAGGATGTCG                            | XhoI             | Generation of pDM4Δ <i>lptE</i>                                   |
| <i>lptE</i> mut_UP_RV     | c <u>gggatc</u> CGGCGCTGGTCAGGATAC                            | BamHI            | Generation of pDM4Δ <i>lptE</i>                                   |
| <i>lptE</i> mut_DOWN_FW   | c <u>gggatc</u> TGAAGGTCACCAGCAACGC                           | BamHI            | Generation of pDM4Δ <i>lptE</i>                                   |
| <i>lptE</i> mut_DOWN_RV   | g <u>ctctaga</u> TCACGGGGTGGGGA <sup>b</sup> ACTC             | XbaI             | Generation of pDM4Δ <i>lptE</i>                                   |
| <i>lptE</i> _pME6032_FW   | c <u>ggaattc</u> CCGGGGCGCTGATCAAC                            | EcoRI            | Generation of pME <i>lptE</i>                                     |
| <i>lptE</i> _pME6032_RV   | cc <u>gctcgag</u> TCACGGGGTGGGGA <sup>b</sup> ACTC            | XhoI             | Generation of pME <i>lptE</i>                                     |
| <i>lptD-6his</i> _UP_FW   | g <u>ctcta</u> GACTGGCGCATCAACTCCG                            | XbaI             | Generation of pDM4 <i>lptD-6his</i>                               |
| <i>lptD-6his</i> _UP_RV   | c <u>ggaattc</u> aatggtgatggtgatggtgCATAGCTTG<br>ATCTTCACGTTG | EcoRI            | Generation of pDM4 <i>lptD-6his</i>                               |
| <i>lptD-6his</i> _DOWN_FW | c <u>ggaattc</u> CAAGACGGAAATGTTCTCTCG                        | EcoRI            | Generation of pDM4 <i>lptD-6his</i>                               |
| <i>lptD-6his</i> _DOWN_RV | cc <u>gctcg</u> AGTTCTTCACCTCTGCTCG                           | XhoI             | Generation of pDM4 <i>lptD-6his</i>                               |
| <i>6his</i> _check_FW     | CACCATCACCATCACCATTGA                                         |                  | PCR screening of <i>lptD-6his</i> recombinant strains             |
| M13FW                     | GTTTTCCCAGTCACGAC                                             |                  | Sequencing from pBS                                               |
| M13RV                     | CAGGAAACAGCTATGAC                                             |                  | Sequencing from pBS                                               |
| P <sub>BAD</sub> _FW      | CATAAGATTAGCGGATCCTAC                                         |                  | Sequencing from mini-CTX1- <i>araCP</i> <sub>BAD</sub> constructs |

<sup>a</sup> Preparative PCRs for cloning were performed using the genomic DNA of *P. aeruginosa* PAO1 as the template.

<sup>b</sup> The restriction site used for cloning is underlined in the primer sequence.

**A**

```
GACTGGCGCATCAACTCCGACTTCAATTGGAACCCCCAACACCAGTCGTAAGTCCGGTAGCGCCATCTTCCACTACCA
GCCCGAAGTCGATCCGGGCAAGGTGGTCAACGTTGGCTATCGCTATCGTGCAGATGCTCGGCGCTTTGATTCCCTCCCGCG
GCACATTCGGATATGGCAACGAAACGACATCATCAAGCAGCAGGATTTCTCGGTATCTGGCCGCTGGTGGCCGAGTGG
TCCGTGCTCGCCCGCTGGCAGTACGACTACAACAAGAACCACCCCTCGAGGCCCTTCGGCGGCTTCGAATACGACAGCTG
CTGCTGGAAGCTGCGCCTGATCAACCGCTACTGGCTGGATGTGGACGATGACGCCTTCCTCGTGCAGAGCGAGAAGGCCG
ACCGCGGCATCTTCCTGCAGATCGTCCCTGAAGGGCCTCGGCGGCATCGTAGGCAA CAAGACGGAAATGTTCCCTCGACAAA
GGCATCCAAGTTATCGT CAAC GTC AAGATCAAGCTATG TAA CCGGCTGCGCCCCCTTGCATTGGGCGCAGCACTCCTTT
GCTCCTTCGCGCATGCCGAAGTGGTACCCTGGACC GGTCGTCGCCATCGTCGACAACGATGTGATCATGCAGAGCCAG
CTCGACCAGCGCCTGCGTGAAGTGCACCAGACGCTGCTCAAGCGCGGTGCGCCGCTGCCGCCGAGCACGTGCTGACCCA
GCAGGTGCTGGAACGCCTGATCATCGAGAACATCCAGCAGCAGATCGGCGACCGCTCCGGCATCCGCATCTCCGACGAGG
AGCTGAACCAGGCGATGGGCACCATCGCCAGCGCAACGGCATGAGCCTGGAGCAGTTCAGACCGCCCTCACCCGCGAC
GGCTTGCTTACGCCGACGCCCGGAGCAGGTCCGTGCGGAGATGGTGATCAGCCGTGTGCGCCAGCGCCGGGTGCGCCA
GCGCATCCAGGTCAG CGAGCAGGAGGTGAAGA ACT
```

**B**

```
ACACCAGTCGTAAGTCCGGTAGCGCCATCTTCCACTACCAGCCCGAAGTCGATCCGGGCAAGGTGGTCAACGTTGGC
TATCGCTATCGTGCAGATGCTCGGCGCTTTGATTCCCTCCCGCGGCACATTCGGATATGGCAACGAAACGACATCATCAA
GCAGCAGATTTCTCGGTATCTGGCCGCTGGTGCCGAGTGGTCCGTGCTCGCCCGCTGGCAGTACGACTACAACAAGA
ACCGCACCCCTCGAGGCCCTTCGGCGGCTTCGAATACGACAGCTGCTGCTGGAAGCTGCGCCTGATCAACCGCTACTGGCTG
GATGTGGACGATGACGCCTTCCTCGTGCAGAGCGAGAAGGCCGACCGCGGCATCTTCCTGCAGATCGTCCCTGAAGGGCCT
CGGCGGCATCGTAGGCAACAAGACGGAAATGTTCCCTCGACAAAGGCATCCAAGGTTATCGTCAACGTGAAGATCAAGCTA
TG CACCATCACCATCACCAT TGA ATTCAAGACGGAAATGTTCCCTCGACAAAGGCATCCAAGGTTATCGTCAAC GTC AAGA
TCAAGCTATGTAACCGGCTGCGCCCCCTTGCATTGGGCGCAGCACTCCTTTGCTCCTTCGCGCATGCCGAAGTGGTACCA
CTGGACC GGTCGTCGCCATCGTCGACAACGATGTGATCATGCAGAGCCAGCTCGACCAGCCCTGCGTGAAGTGCACCA
GACGCTGCTCAAGCGCGGTGCGCCGCTGCGCCCGGAGCAGTGTGACCGAGCAGGTTGGAACGCCTGATCATCGAGA
ACATCCAGCAGCAGATCGGCGACCGCTCCGGCATCCGCATCTCCGACGAGGAGCTGAACCAGGCGATGGGCACCATCGCC
CAGCGCAACGGCATGAGCCTGGAGCAGTTCAGACCGCCCTCACCCGCGACGGCTTGCTCCTACGCCGACGCCCGGAGCA
GGTCCGTGCGGAGATGGTGATCAGCCGTGTGCGCCAGCGCCGGGTGCGCGAGCGCA
```

**Figure S1.** Genomic region encompassing the 3' end of *lptD* and the 5' end of *surA* in (A) the wild type strain *P. aeruginosa* PAO1 ([www.pseudomonas.com](http://www.pseudomonas.com)), and (B) the recombinant strains PAO1 *lptD-6his* and *lptE lptD-6his* (Table S1). The DNA region in panel B was verified by DNA sequencing for both PAO1 *lptD-6his* and *lptE lptD-6his*. The stop codon of *lptD* and the start codon of *surA* are highlighted in red and green, respectively. The annealing region of primers used for pDM4*lptD-6his* construction are highlighted in grey in panel A (from top to bottom: *lptD6his\_UP\_FW*, *lptD6his\_DOWN\_FW*, *lptD6his\_UP\_RV*, *lptD6his\_DOWN\_RV*; Table S2). The 6His-tag encoding sequence and the DNA region duplicated in the PAO1 *lptD-6his* and *lptE lptD-6his* genomes are highlighted in yellow and underlined, respectively (panel B).

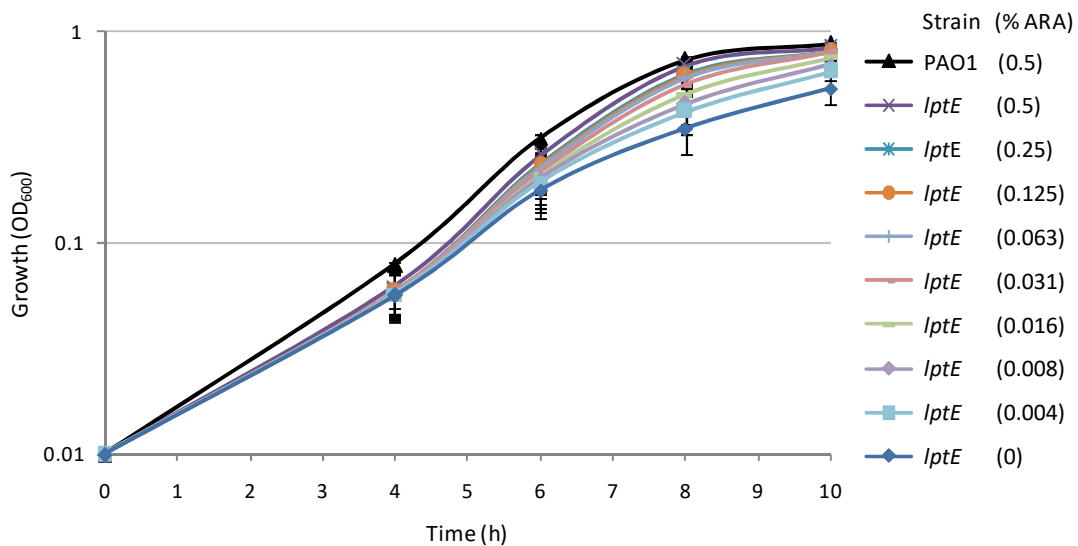

**Figure S2.** Growth of *P. aeruginosa* PAO1 and the *lptE* conditional mutant in 96-well microtiter plates in MH broth supplemented with increasing concentrations of arabinose (ARA, 0-0.5%) at 37°C and vigorous shaking (200 rpm). Results are the mean ( $\pm$  SD) of three independent experiments performed in triplicate.

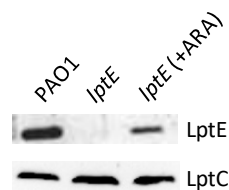

**Figure S3.** Intracellular levels of LptE and LptC in PAO1 and *lptE* cells grown for 14 h in MH supplemented or not with ARA, determined by western blot analysis of whole cell lysates (20  $\mu$ g of proteins) with antibodies against LptE or LptC, as indicated on the right of each blot. Filters were developed with ECL chemiluminescent reagents and visualized in a ChemiDoc XRS+ system.

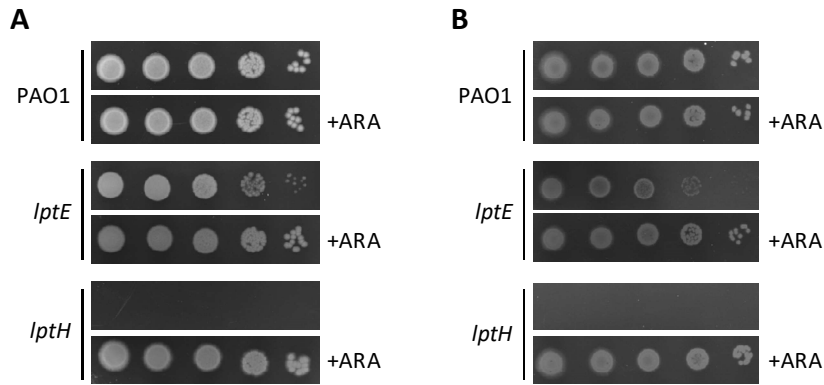

**Figure S4.** Colony growth of *P. aeruginosa* PAO1, the *lptE* conditional mutant and the *lptH* conditional mutant (used as control) on LB (panel A) or M9 minimal medium supplemented with 20 mM succinate and 50 μM FeCl<sub>3</sub> (panel B), in the presence or in the absence of 0.5% arabinose (ARA). Exponential phase cultures in LB or M9 with 0.5% ARA were normalized to OD<sub>600</sub> = 1 in saline, and 5 μl of the 10<sup>-2</sup>-10<sup>-6</sup> dilutions were spotted onto the plates and incubated for 20 h at 37°C. The images are representative of two independent experiments giving similar results.

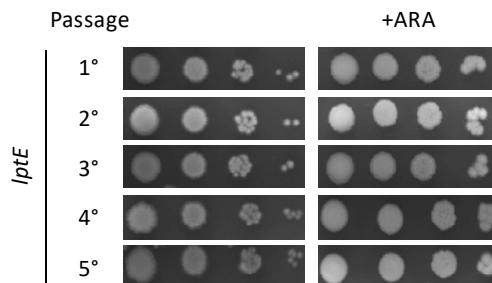

**Figure S5.** Colony growth of the *P. aeruginosa* *lptE* conditional mutant cultured for up to 5 subsequent passages on MH agar plates. At each passage, several colonies from MH agar without arabinose (ARA) were resuspended in saline, normalized to OD<sub>600</sub> = 1 in saline, and 5 μl of the 10<sup>3</sup>-10<sup>6</sup> dilutions were spotted onto MH agar with or without 0.5% ARA. Pictures were taken after 20 h incubation at 37°C. The images are representative of two independent experiments giving comparable results.

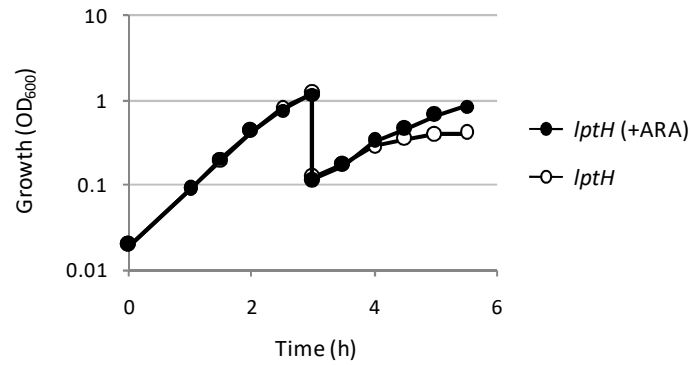

**Figure S6.** Growth of the *lptH* conditional mutant at 37°C in MH at 200 rpm in flasks after two successive subcultures in the presence (filled symbols) or in the absence (open symbols) of 0.5% arabinose (ARA), in order to obtain cells depleted of LptH. Briefly, bacteria were cultured for 14 h in MH supplemented with 0.5% ARA (not shown in the figure) and then diluted 1:100 in fresh medium with or without ARA (time 0). After 3 h of growth, cultures were diluted again 1:10 in fresh medium and incubated at 37 °C. The graph is representative of several assays giving similar results.

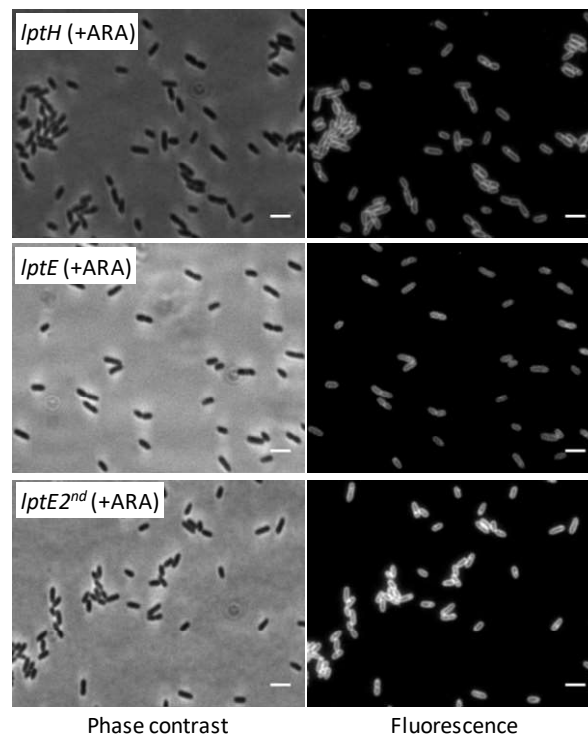

**Figure S7.** Phase contrast and fluorescence microscopy images of *P. aeruginosa* *lptH* and *lptE* conditional mutant cells grown in the presence of 0.5% arabinose and stained with the membrane-binding dye FM<sup>TM</sup> 5-95. Images are representative of several fields ( $\geq 10$ ) showing comparable results. Scale bar: 3  $\mu$ m.

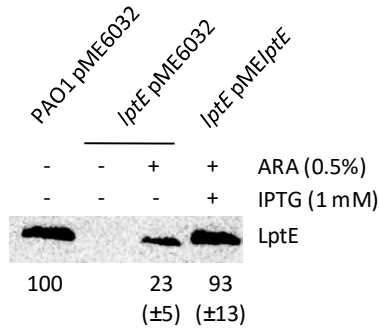

**Figure S8.** Intracellular LptE levels in PAO1 pME6032, *lptE* pME6032 and *lptE* pME/*lptE* cells grown for 14 h in MH supplemented or not with 0.5% ARA and 1 mM IPTG, determined by Western blot analysis of whole cell lysates (20  $\mu$ g of proteins) using the anti-LptE antibody. The image is representative of three assays giving comparable results. Quantification of LptE levels is reported below each lane, expressed as percentage (mean $\pm$ SD) of the amount present in the wild type carrying the empty plasmid.
